# Supplementary material for: Influence of covariance of aerosol and meteorology on co-located precipitating and non-precipitating clouds over the Indo-Gangetic Plain
Source: Copernicus journal article supplement (doi:10.5194/acp-24-11333-2024), 2024-10-10
Supplement: Supplementary file 1 [file acp-24-11333-2024-supplement.pdf]

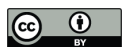

*Supplement of*

## **Influence of covariance of aerosol and meteorology on co-located precipitating and non-precipitating clouds over the Indo-Gangetic Plain**

**Nabia Gulistan et al.**

*Correspondence to:* Khan Alam ([khanalam@uop.edu.pk](mailto:khanalam@uop.edu.pk))

The copyright of individual parts of the supplement might differ from the article licence.

Table 1S. Decadal percentage variations in average values of AOD over the eastern part of IGP

|                        | Kolkata | Dhaka | Patna |
|------------------------|---------|-------|-------|
| Total number of counts | 1976    | 2018  | 2629  |
| Decadal change in AOD  | 18%     | 22.6% | 23.3% |

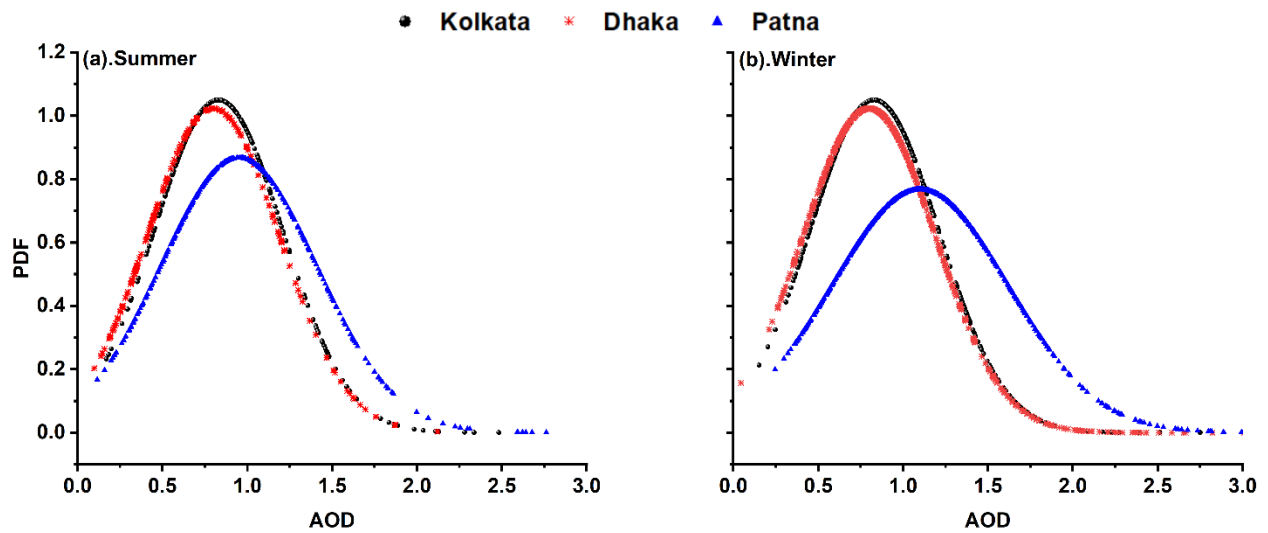

**Figure 1S.** The probability density function (PDF) of AOD over study sites is shown (a) and (b) for the summer and winter seasons respectively.

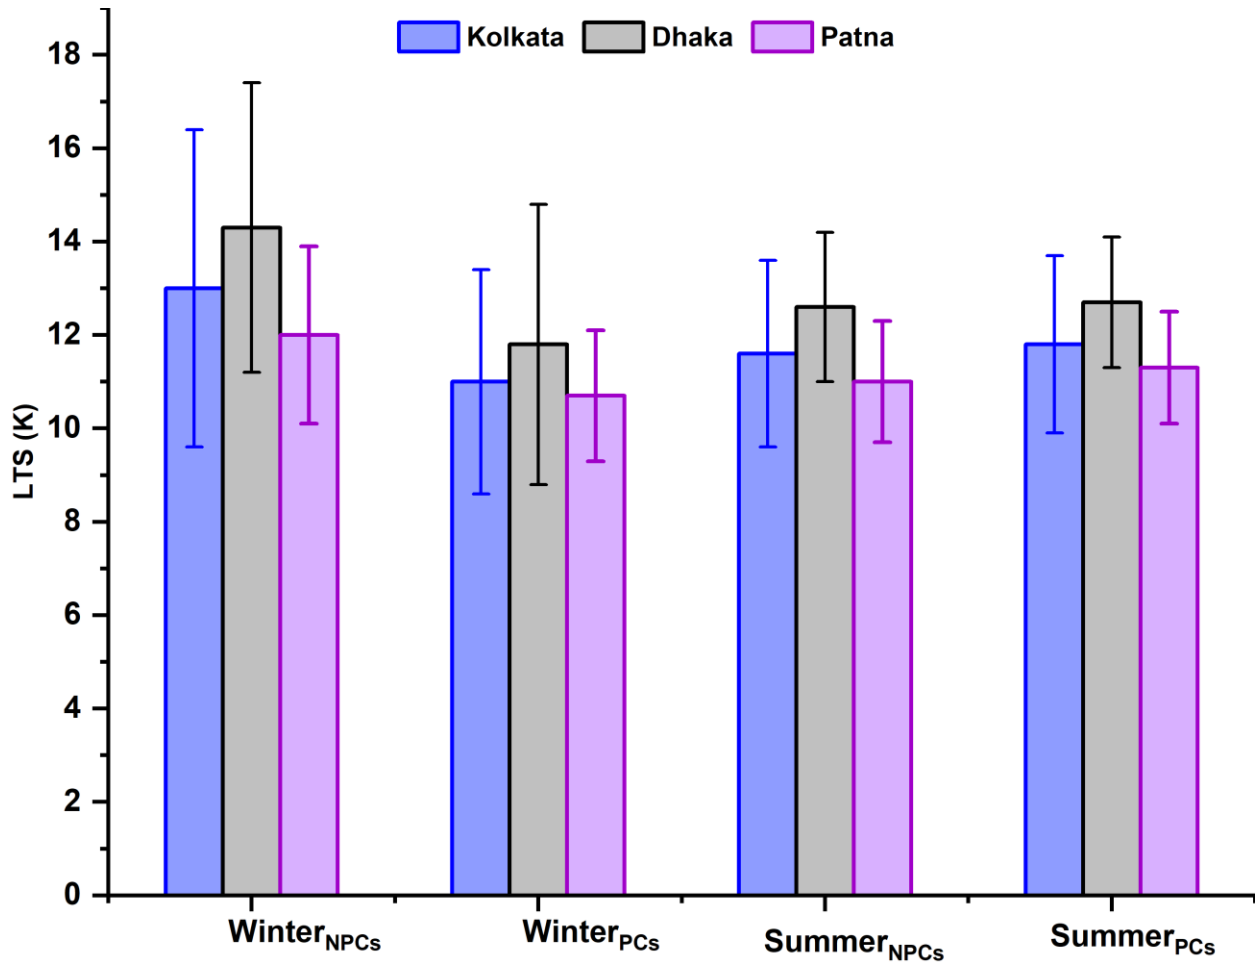

**Figure 2S.** Variations in lower tropospheric stability (LTS) over all study sites for PCs and NPCs in winter and summer seasons, the error bars show the standard deviation (SD) values

**Table 2S.** Meteorological parameters for PCs(NPCs) in summer and winter seasons. Maximum values are for both types of clouds shown in bold and minimum values are indicated in italics.

|                | Winter Season        |                    |                      | Summer Season        |                    |                      |
|----------------|----------------------|--------------------|----------------------|----------------------|--------------------|----------------------|
|                | T <sub>850</sub> (K) | RH%                | $\omega$ (m/s)       | T <sub>850</sub> (K) | RH%                | $\omega$ (m/s)       |
| <b>Kolkata</b> | <b>286.7 (286)</b>   | <i>47.4 (39.9)</i> | <i>-0.002 (0.08)</i> | <b>295.5 (295)</b>   | <i>74.8 (72.8)</i> | <i>-0.15 (-0.14)</i> |
| <b>Dhaka</b>   | <i>285.8 (285.3)</i> | <i>48.5 (49.2)</i> | <b>0.04 (0.08)</b>   | <i>294.5 (294.4)</i> | <i>76.5 (74.6)</i> | <i>-0.13 (-0.10)</i> |
| <b>Patna</b>   | <i>284.7 (284.3)</i> | <b>64.6 (55.8)</b> | <i>-0.06 (0.05)</i>  | <b>295.3 (297.3)</b> | <b>88.8 (83.5)</b> | <b>-0.19 (-0.17)</b> |

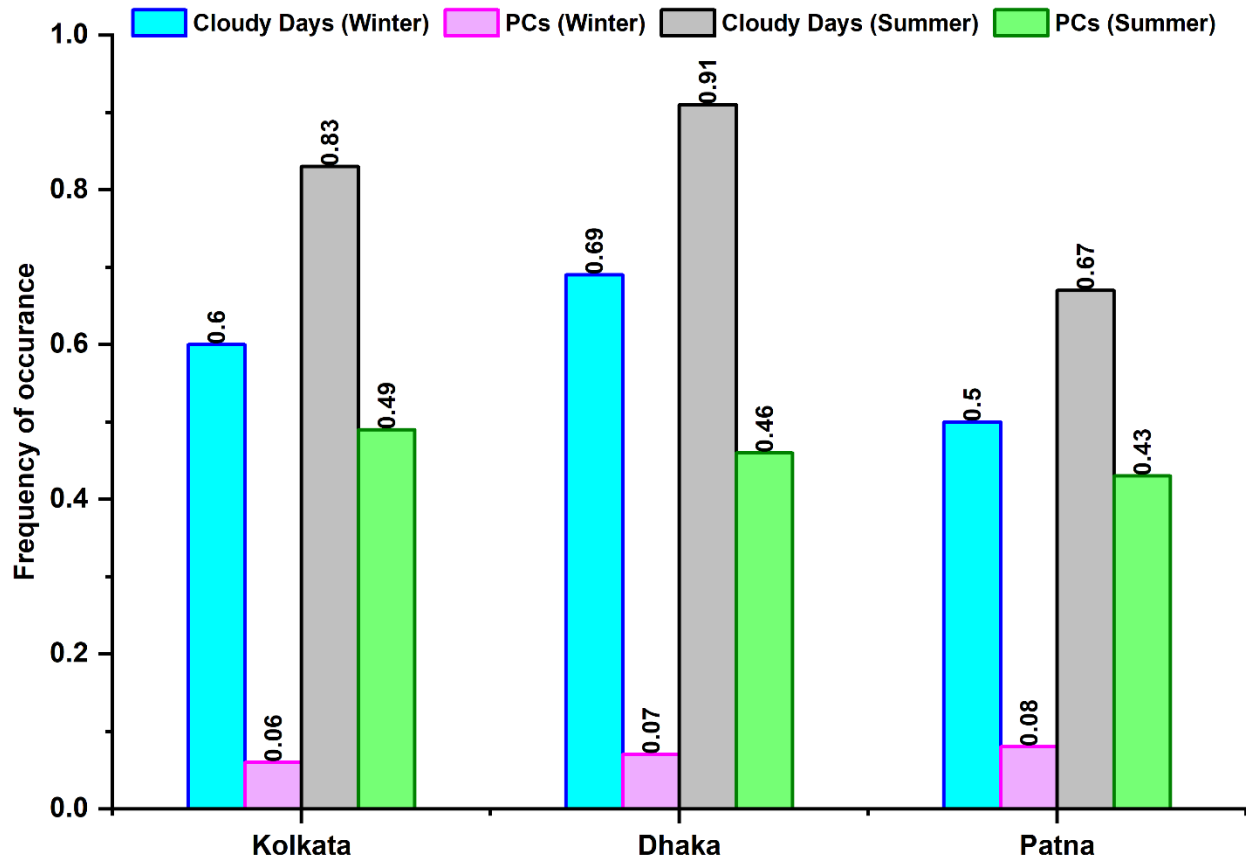

**Figure 3S.** The frequency of occurrence of total cloudy days (including PCs and NPCs) and only PCs is shown for both winter and summer seasons.

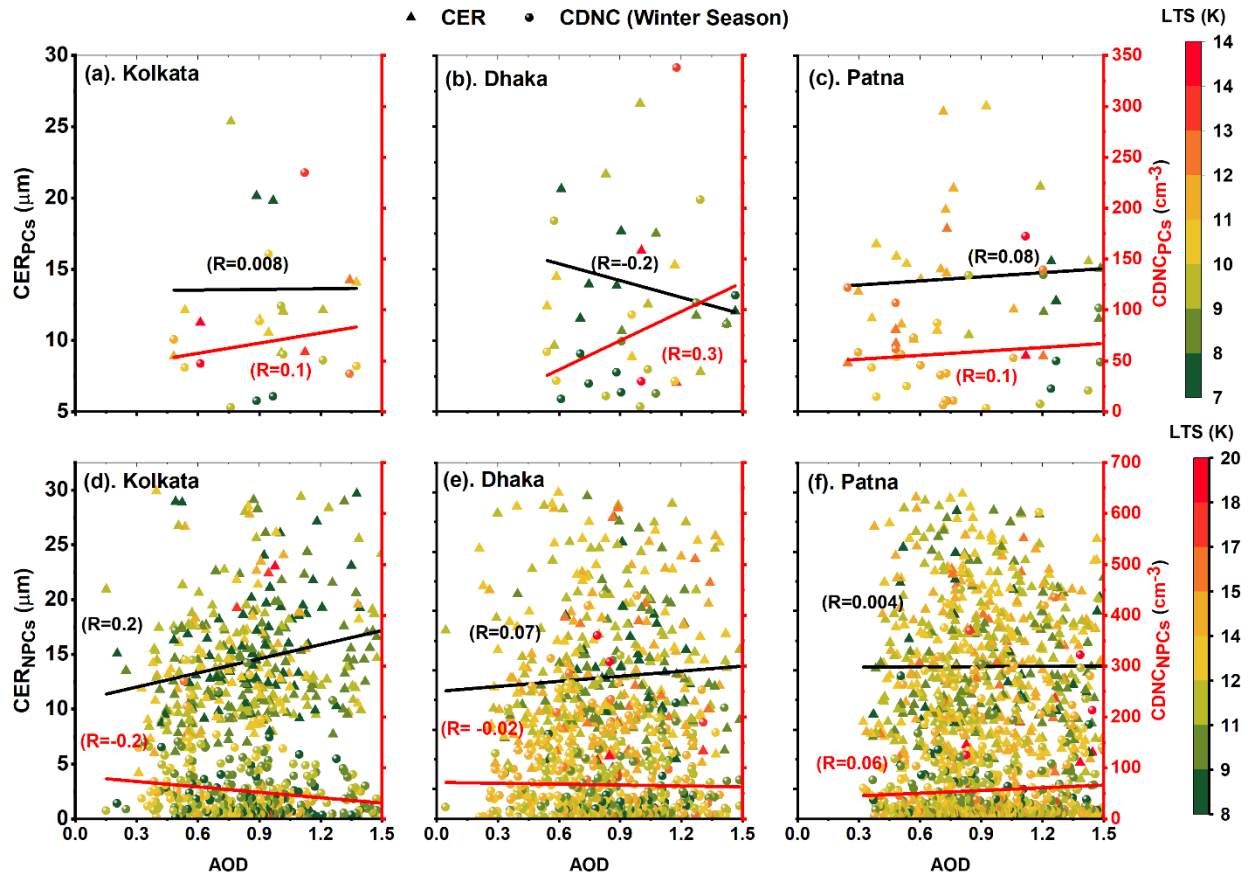

**Figure 4S.** AOD-CER and AOD-CDNC correlation coefficient for PCs and NPCs over all study areas in the winter season.

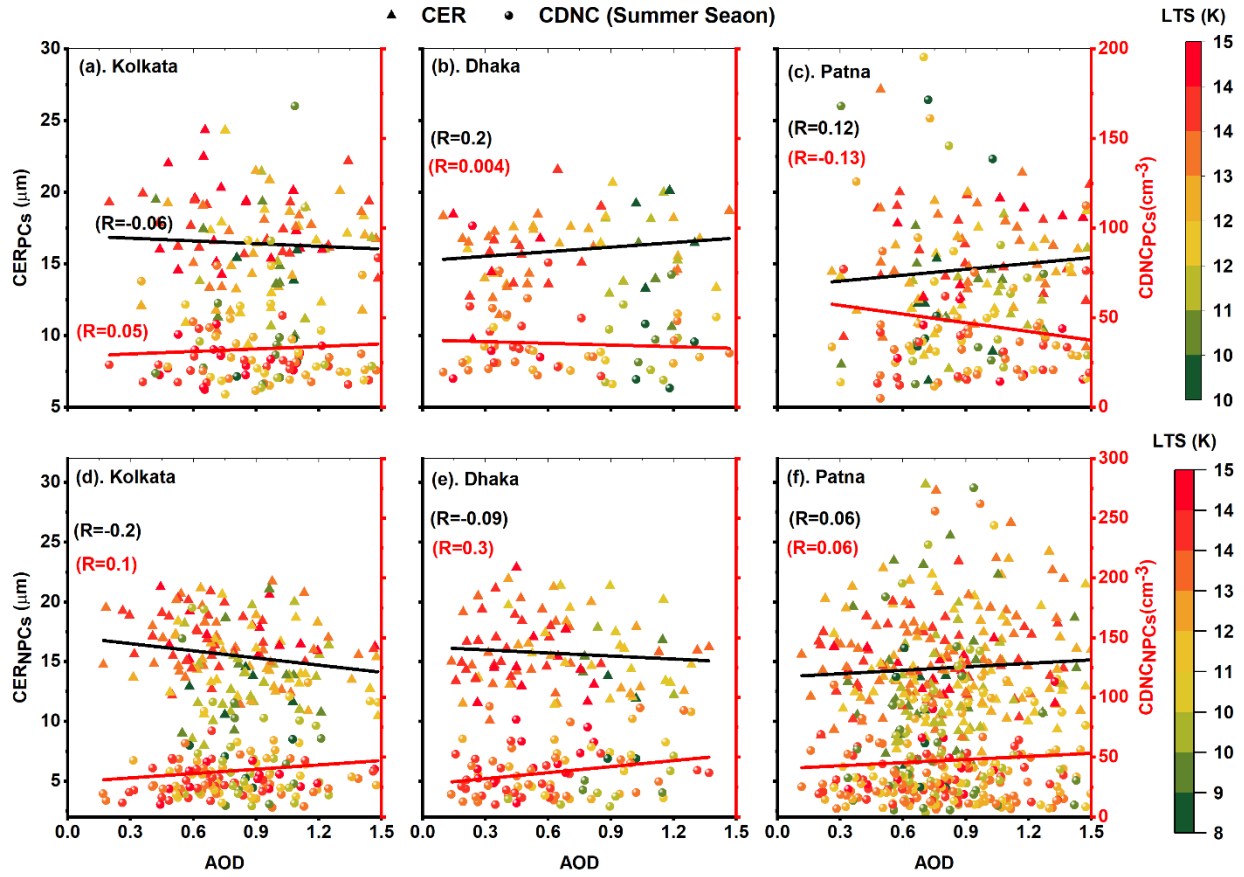

Figure 5S. Same as Figure 4S but in the summer season.

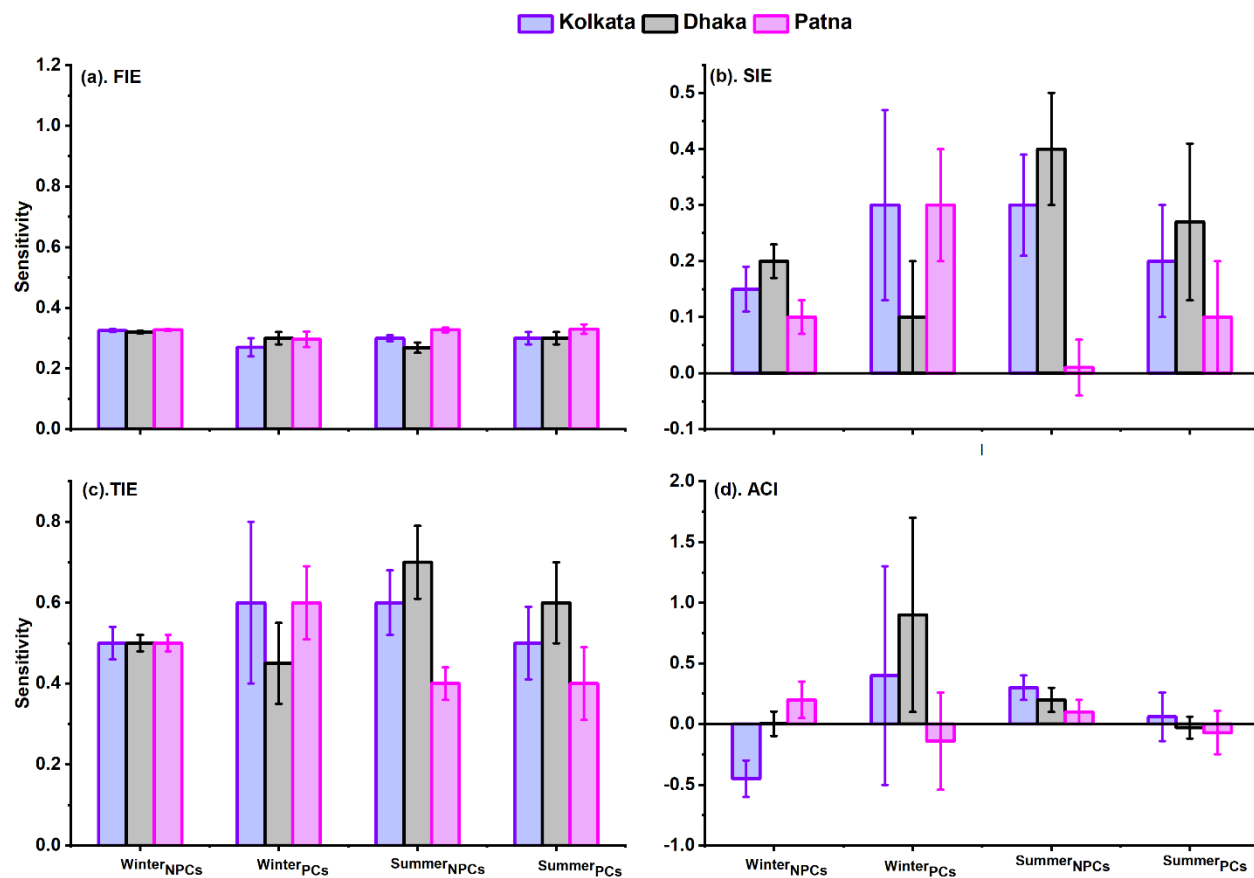

**Figure 6S.** The sensitivity matrices estimated for aerosol-cloud relationship using CDNC are shown in (a) FIE, (b) SIE, (c) TIE, and (d) ACI.
